# Supplementary material for: A β-N-acetylhexosaminidase Amuc_2109 from Akkermansia muciniphila protects against dextran sulfate sodium-induced colitis in mice by enhancing intestinal barrier and modulating gut microbiota
Source: Royal Society of Chemistry journal article supplement (doi:10.1039/d1fo04094d), 2022-01-01
Supplement: d1fo04094d1.pdf [file d1fo04094d1.pdf]

**Supplement Figures**

**Fig. S1** Sequence alignment of a region surrounding the acid/base residue of selected family 3 hexosaminidases.

Fig. S1

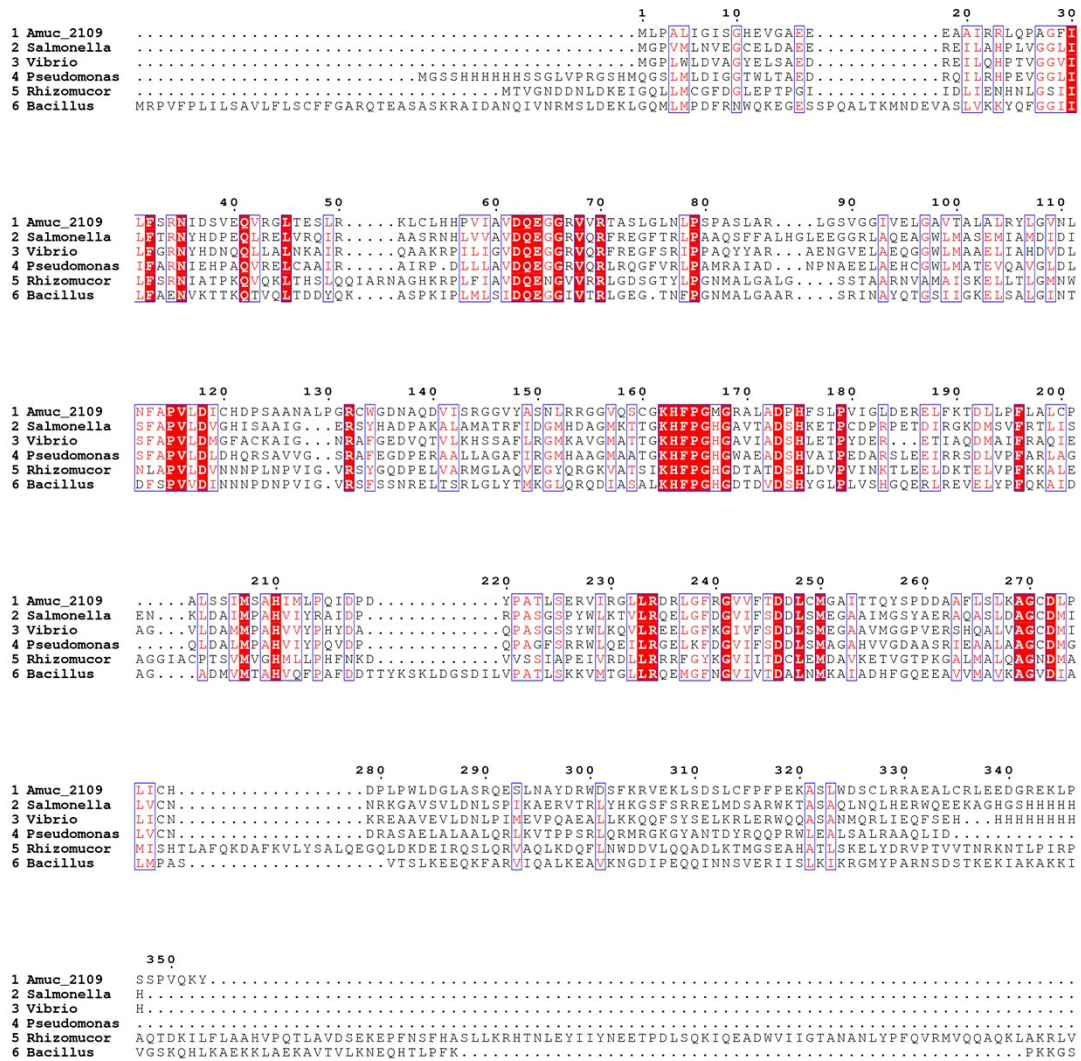

## **Supplement Tables**

**Tab. S1** Specific activity of Amuc\_2109 and mutant toward pNP- $\beta$ -GlcNAc

**Tab. S2** Pathological scores

**Tab. S3** Disease activity index (DAI) scoring system

**Tab. S4** Oligonucleotide primers used for qRT-PCR

**Tab. S1**

| Enzyme              | Substrate            | Specific activity (U/mg) |
|---------------------|----------------------|--------------------------|
| Wild-type Amuc_2109 | pNP- $\beta$ -GlcNAc | 14.9 $\pm$ 0.3           |
| D246A               | pNP- $\beta$ -GlcNAc | None Detected            |
| D246N               | pNP- $\beta$ -GlcNAc | None Detected            |

**Tab. S2**

| score | Inflammation | Mucosal damage        | Crypt damage         | Range of lesions (%) |
|-------|--------------|-----------------------|----------------------|----------------------|
| 0     | None         | None                  | None                 | 0                    |
| 1     | Mild         | Mucus layer           | 1/3                  | 1-25                 |
| 2     | Moderate     | Submucosa             | 2/3                  | 26-50                |
| 3     | Severe       | Muscularis and serosa | 100%                 | 51-75                |
| 4     | —            | —                     | 100%+epithelium loss | 76-100               |

**Tab. S3**

| DAI score | Weight loss (%) | Stool consistency     | Occult/gross bleeding           |
|-----------|-----------------|-----------------------|---------------------------------|
| 0         | None            | Normal                | Negative hemocult               |
| 1         | 1-5             | Soft but still formed |                                 |
| 2         | 6-10            | Soft                  | Positive hemocult               |
| 3         | 11-18           | Very soft; wet        | Blood trace in stool<br>visible |
| 4         | >18             | Watery diarrhea       | Gross rectal bleeding           |

**Tab. S4**

| Gene           | 5'-3' Primer sequence                                   |
|----------------|---------------------------------------------------------|
| ZO-1           | F: TCTTCCATCATTTCGCTGTGT<br>R: TCTGAAACCATCAAGTCCACA    |
| Occludin       | F: TCACTTTTCCTGCGGTGACT<br>R: GGGAACGTGGCCGATATAATG     |
| claudin-1      | F: ATGCAAAGATGTTTTGCCACAG<br>R: TACAAATCCCATTGCAGCCC    |
| TNF- $\alpha$  | F: ATGAGAAGTTCCCAAATGGC<br>R: CTCCACTTGGTGGTTTGCTA      |
| IL-1 $\beta$   | F: TGCCACCTTTTGACAGTGATG<br>R: AAGGTCCACGGGAAAGACAC     |
| IL-6           | F: GGCCCTTGCTTCTCTTCG<br>R: ATAATAAAGTTTTGATTATGT;      |
| NLRP3          | F: TGGAAGATTACCCGCCCGAGAA<br>R: TCCAGCAAACCCATCCACTCTTC |
| Caspase-1      | F: TGAAAGACAAGCCCAAGGTGATC<br>R: CAATGAAAAGTGAGCCCCTGAC |
| ASC            | F: CATCTTGTCTTGGCTGGTGGTCT<br>R: CGGACACGGACAGGATTGACA  |
| $\beta$ -actin | F: TGTCCACCTTCCAGCAGATGT<br>R: AGCTCAGTAACAGTCCGCCTAGA  |
